# Supplementary material for: Solution Equilibrium Studies on Salicylidene Aminoguanidine Schiff Base Metal Complexes: Impact of the Hybridization with L-Proline on Stability, Redox Activity and Cytotoxicity
Source: MDPI journal article supplement (doi:10.3390/molecules27072044), 2022-03-22
Supplement: s1 [file s1]

## Supporting Information for

### Solution equilibrium studies on salicylidene aminoguanidine Schiff base metal complexes: impact of the hybridization with L-proline on stability, redox activity and cytotoxicity

Orsolya Dömötör, Nóra V. May, G. Tamás Gál, Gabriella Spengler, Aliona Dobrova, Vladimir B. Arion and Éva A. Enyedy\*

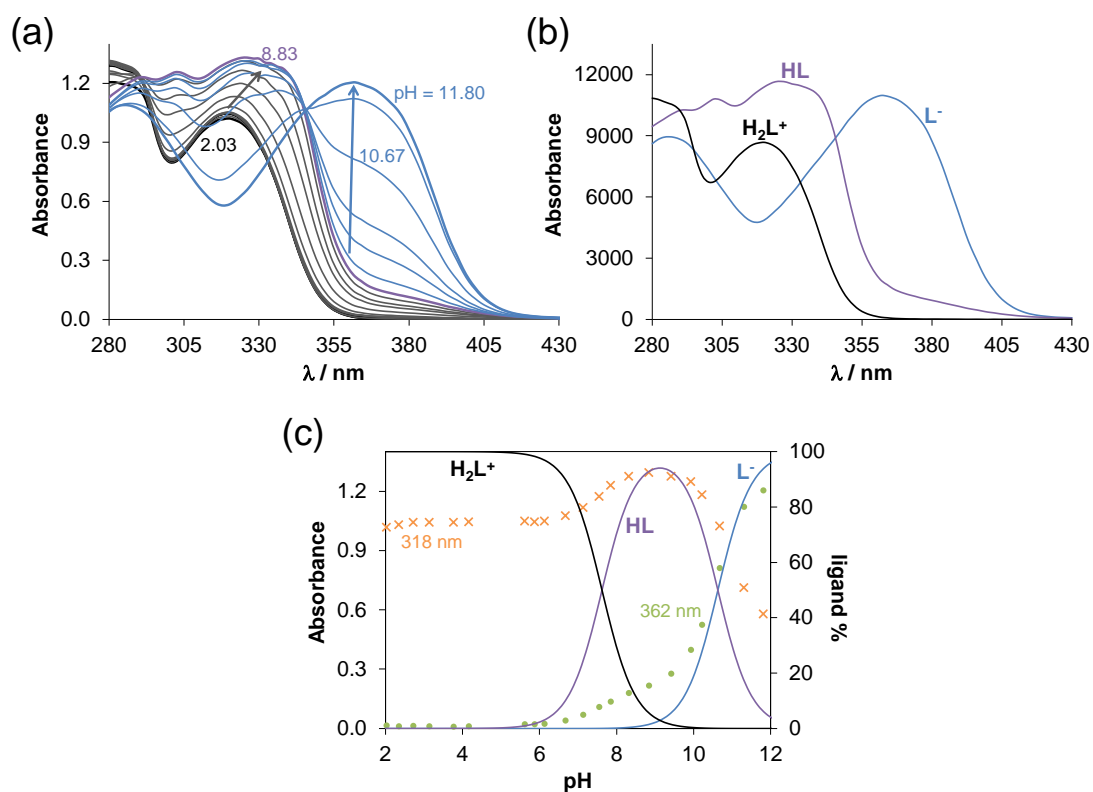

**Figure S1.** (a) UV-vis absorption spectra of SISC recorded in 30% (v/v) DMSO/H<sub>2</sub>O at various pH values, and (b) individual molar absorption spectra of the ligand species in the different protonation states. (c) Concentration distribution curves with absorbance values measured at 318 nm (x) and 362 nm (•). { $C_{\text{ligand}} = 120 \mu\text{M}$ ;  $T = 25 \text{ }^\circ\text{C}$ ;  $I = 0.10 \text{ M (KCl)}$ ;  $\ell = 1 \text{ cm}$ }

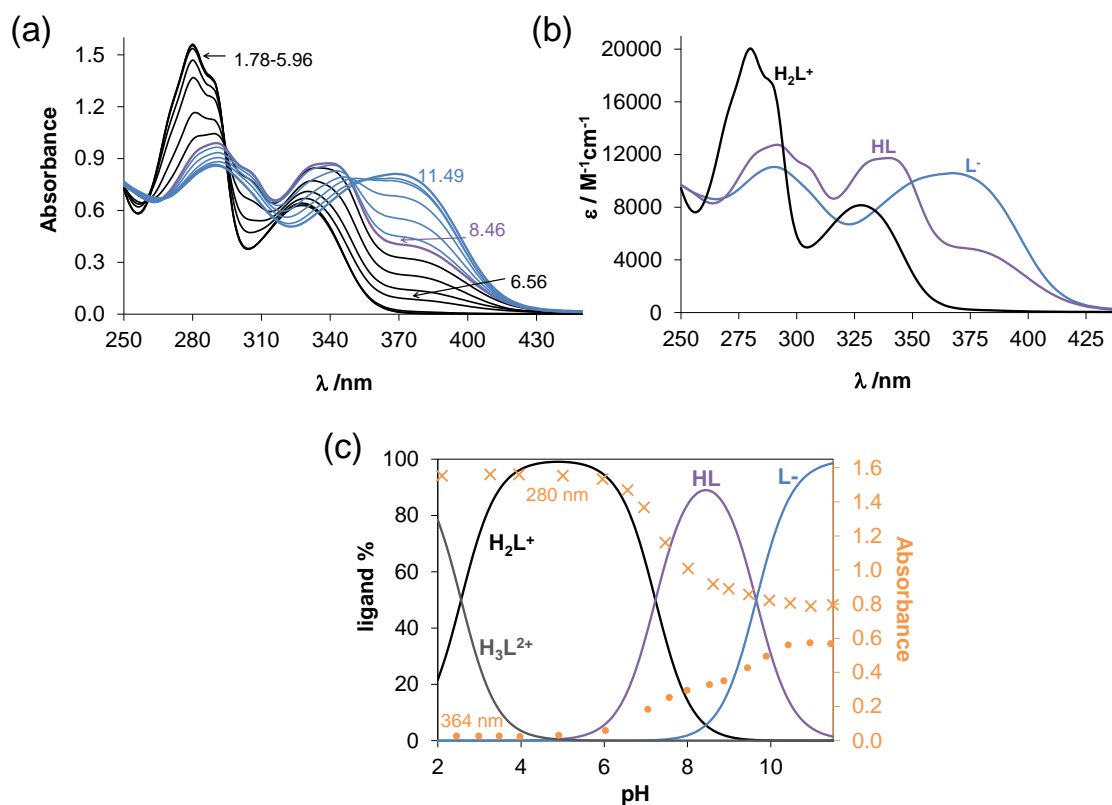

**Figure S2.** (a) UV-vis absorption spectra of Pro-SISC-Me recorded at various pH values in water. (b) Individual molar absorptivity spectra of the ligand species in the different protonation states. (c) Concentration distribution curves with absorbance values measured at 280 nm ( $\times$ ) and 364 nm ( $\bullet$ ).  $\{C_{\text{ligand}} = 73 \mu\text{M}; T = 25^\circ\text{C}; I = 0.10 \text{ M (KCl)}; \ell = 1 \text{ cm}\}$

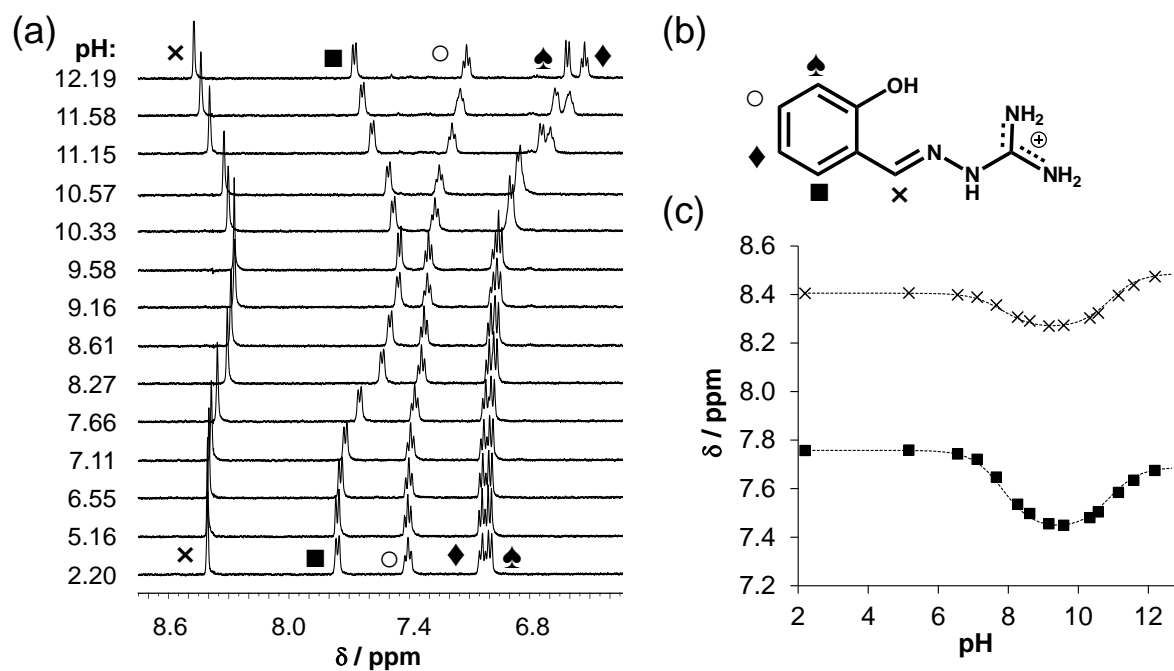

**Figure S3.** (a) <sup>1</sup>H NMR spectra of SISC recorded at the indicated pH values, (b) notation of the symbols at the various peaks, and (c) pH-dependent chemical shifts of two selected CH protons (x, ■) with the fitted curves (dashed lines). {*c*<sub>ligand</sub> = 1.0 mM; 30% (*v/v*) d<sub>6</sub>-DMSO/H<sub>2</sub>O; pH = 2.2 – 12.2; *T* = 25 °C; *I* = 0.10 M (KCl)}.

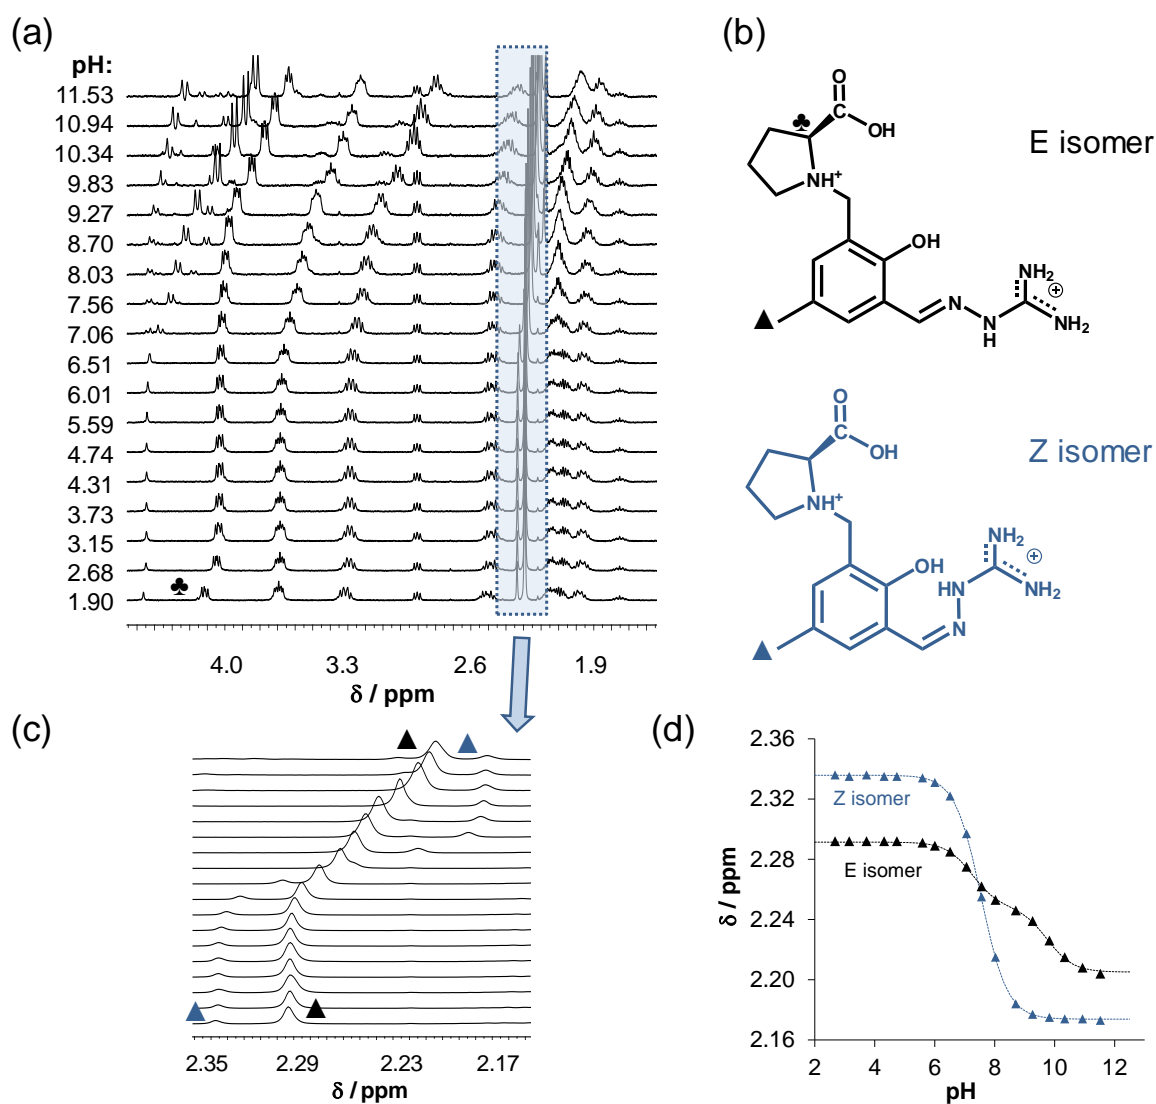

**Figure S4.** (a)  $^1\text{H}$  NMR spectra of Pro-SISC-Me in the high field region recorded at the indicated pH values, (b) structure of the E and the Z isomers with the notation of the symbols of the  $\text{CH}_3$  protons ( $\blacktriangle, \blacktriangleleft$ ), and (c)  $^1\text{H}$  NMR spectra in the chemical shift range of the  $\text{CH}_3$  protons, and (d) the chemical shifts of the  $\text{CH}_3$  protons plotted against the pH for the E isomer ( $\blacktriangle$ ) and the Z isomer ( $\blacktriangleleft$ ) with the fitted curves (dashed lines).  $\{C_{\text{ligand}} = 1.0 \text{ mM}; 10\% (v/v) \text{ D}_2\text{O}/\text{H}_2\text{O}; \text{pH} = 2.2 - 12.2; T = 25 \text{ }^\circ\text{C}; I = 0.10 \text{ M (KCl)}\}$ .

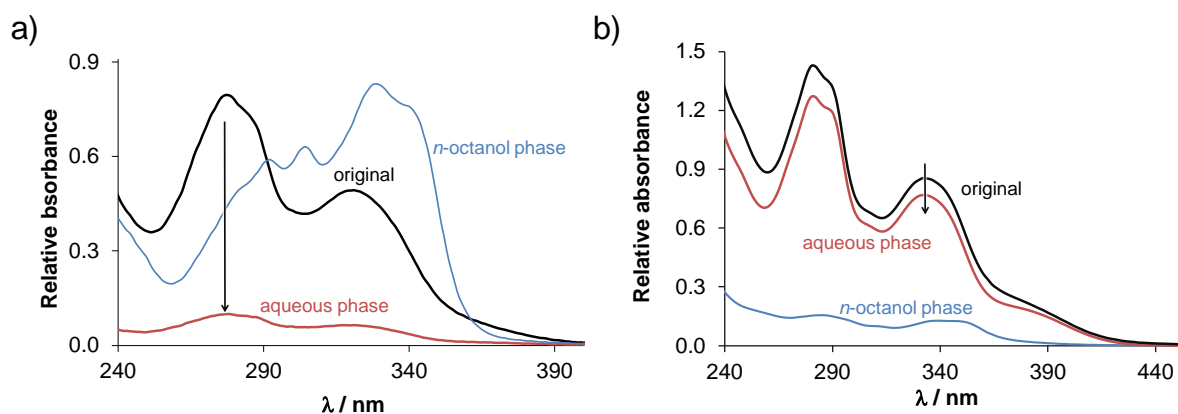

**Figure S5.** UV-vis absorption spectra of (a) SISC and (b) Pro-SISC-Me recorded for the original solution (black line) and for the aqueous (red line) and *n*-octanol (blue line) phases after partitioning. {pH = 7.4 (10 mM HEPES); *I* = 0.1 M (KCl); *T* = 25 °C}.

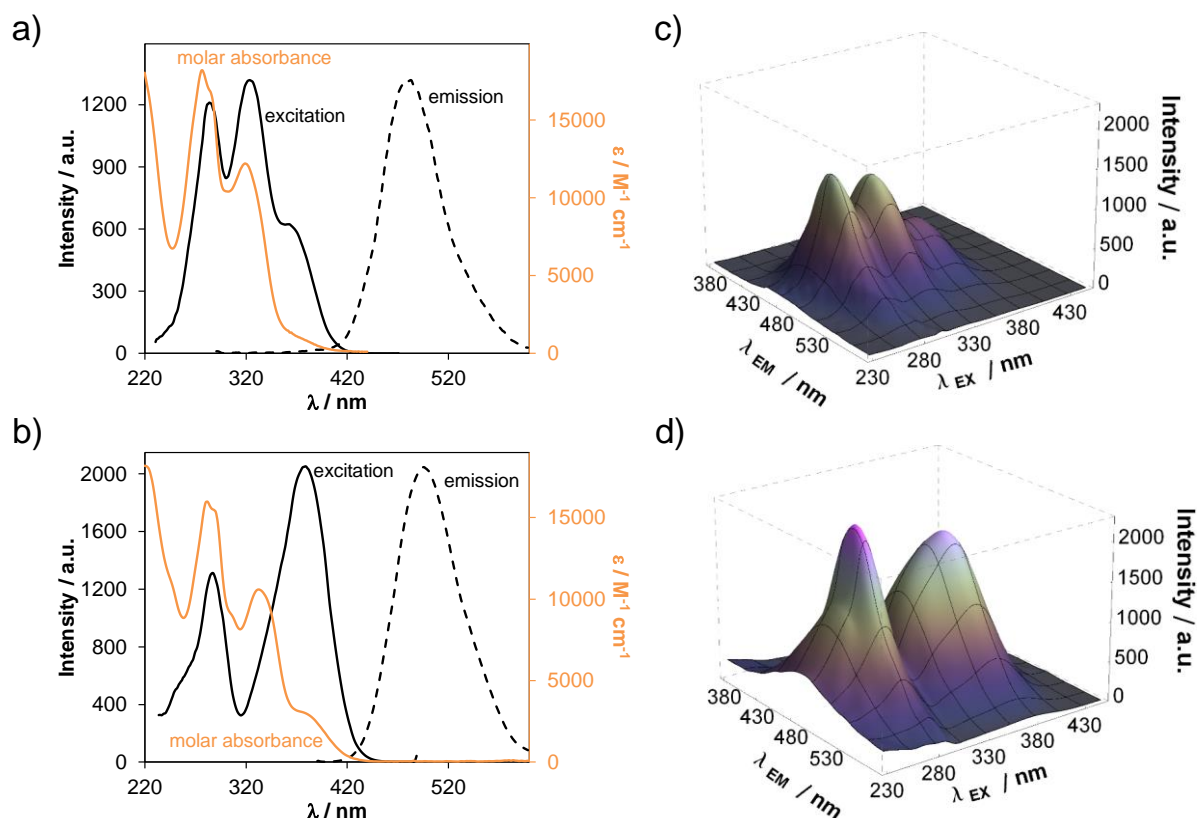

**Figure S6.** Molar UV-vis absorbance (orange line), excitation (black solid line) and emission (black dashed line) spectra of (a) SISC, and (b) Pro-SISC-Me, and the 3-dimensional fluorescence spectrum of (c) SISC and (d) Pro-SISC-Me at pH 7.40 in water. { $C_{\text{ligand}}$  = 10  $\mu\text{M}$ ; *T* = 25 °C; *I* = 0.10 M (KCl);  $\ell$  = 1 cm}

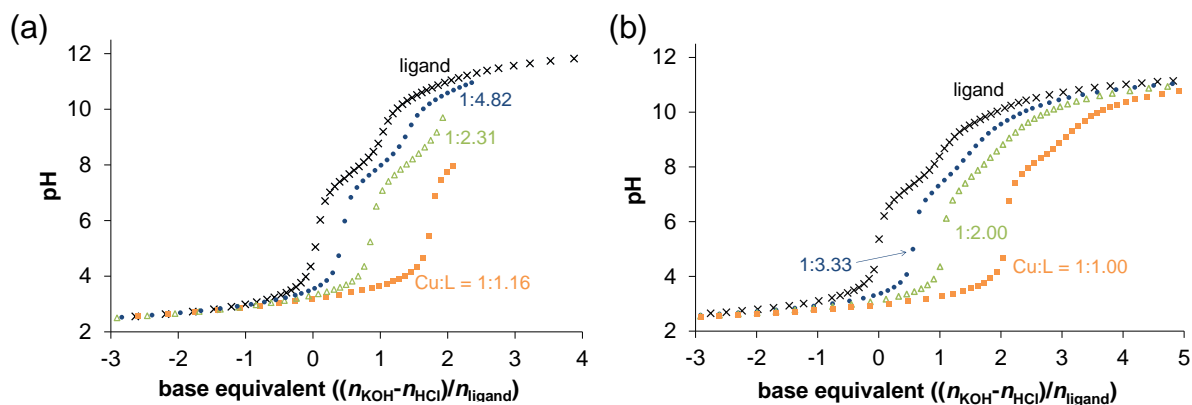

**Figure S7.** pH-potentiometric titration curves obtained for the (a) Cu(II) – SISC system in 30% (v/v) DMSO/H<sub>2</sub>O and (b) Cu(II) – Pro-SISC-Me system in water at various metal-to-ligand ratios (indicated in the figure).  $\{C_{\text{ligand}} = 1 \text{ mM}; T = 25 \text{ }^{\circ}\text{C}; I = 0.10 \text{ M (KCl)}\}$

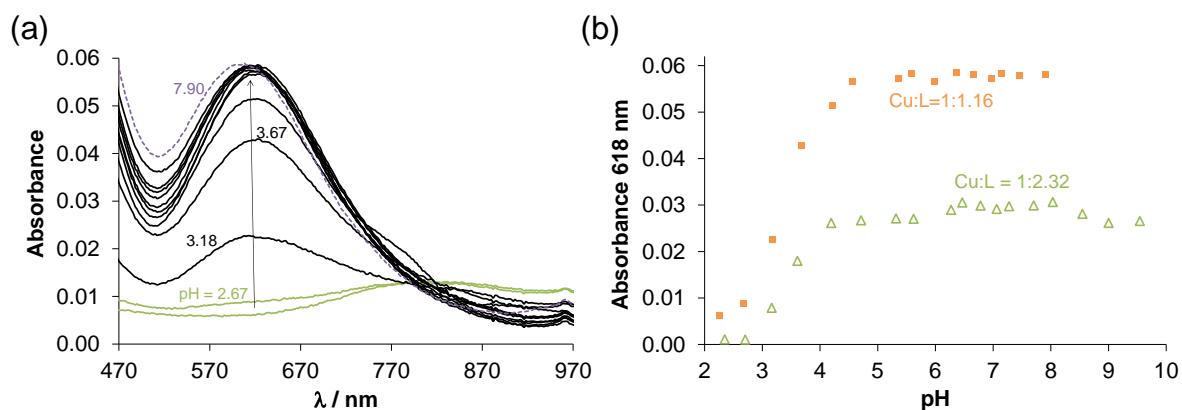

**Figure S8.** (a) UV-vis absorption spectra of the Cu(II) – SISC (1:1.16) system recorded at various pH values and (b) changes of the absorbance at 618 nm at 1:1.16 and 1:2.32 Cu(II)-to-ligand ratios.  $\{30\% \text{ (v/v) DMSO/H}_2\text{O}; C_{\text{ligand}} = 564 \text{ } \mu\text{M}; T = 25 \text{ }^{\circ}\text{C}; I = 0.10 \text{ M (KCl)}; \ell = 2 \text{ cm}\}$

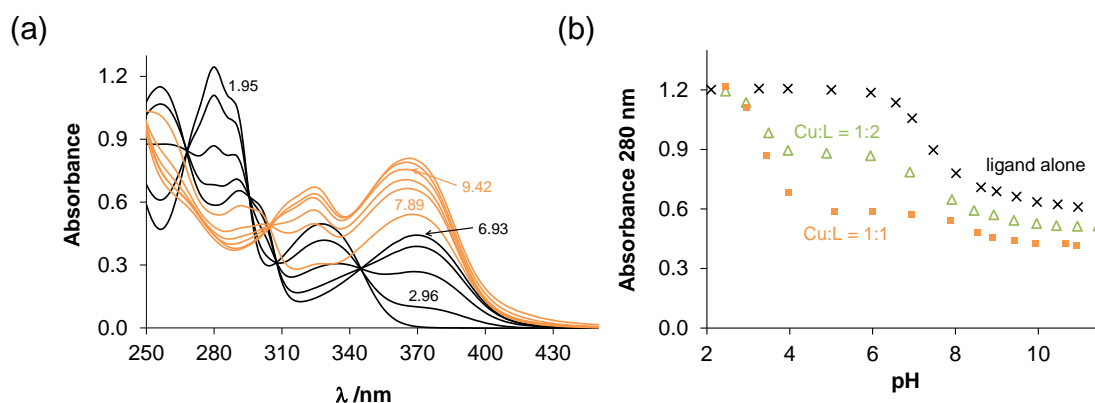

**Figure S9.** (a) UV-vis absorption spectra of the Cu(II) – Pro-SISC-Me (1:1) system recorded in water at various pH values, and (b) changes of the absorbance at 280 nm at 1:1 and 1:2 Cu(II)-to-ligand ratios and for the ligand alone.  $\{C_{\text{ligand}} = 50 \text{ } \mu\text{M}; T = 25 \text{ }^{\circ}\text{C}; I = 0.10 \text{ M (KCl)}; \ell = 1 \text{ cm}\}$

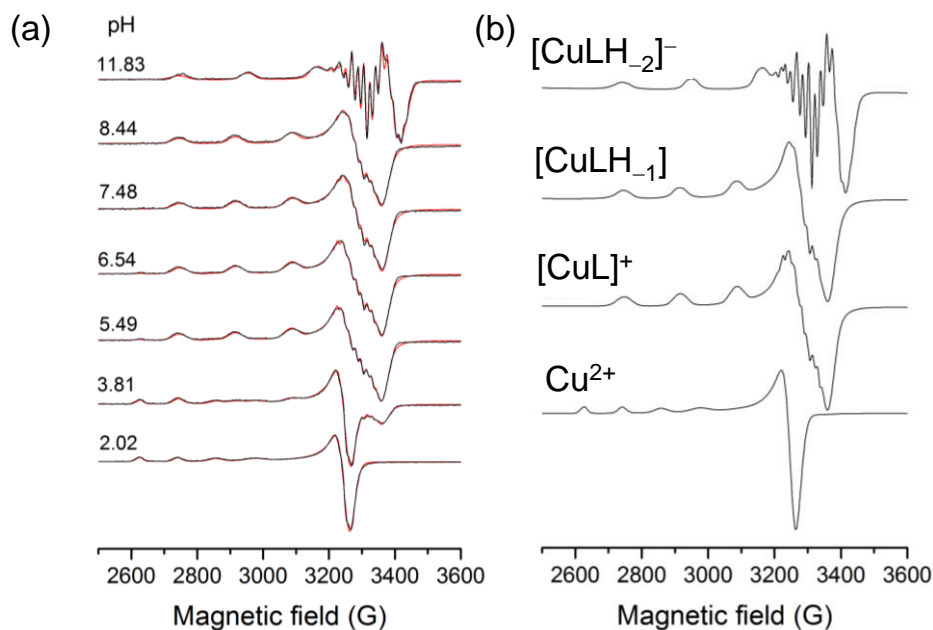

**Figure S10.** (a) Experimental (black) and simulated (red) anisotropic EPR spectra recorded for the Cu(II) – SISC (1 : 1) system in 30% (*v/v*) DMSO/H<sub>2</sub>O at 77 K at various pH values, and (b) the calculated component frozen EPR spectra. {*c*<sub>ligand</sub> = *c*<sub>Cu(II)</sub> = 250 μM; *I* = 0.10 M (KCl)}.

**Table S1.** Isotropic EPR parameters calculated for the various species in the Cu(II) – Pro-SISC-Me complexes in water, and the overall stability constants of the complexes calculated from the deconvolution of the spectra. {*I* = 0.10 M (KCl)}<sup>a</sup>

|                            | $\text{Cu}^{2+}$ | $[\text{CuL}]^+$ | $[\text{CuLH}_{-1}]$ | $[\text{CuLH}_2]^-$ |
|----------------------------|------------------|------------------|----------------------|---------------------|
| $g_0$                      | 2.192            | 2.119            | 2.106                | 2.100               |
| $A_0 / \text{G}$           | 36.6             | 61.6             | 66.2                 | 86.6                |
| $a^{\text{N1}} / \text{G}$ | –                | 16.9             | 17.2                 | 15.5                |
| $a^{\text{N2}} / \text{G}$ | –                | 12.1             | 12.2                 | 14.1                |
| $\alpha / \text{G}$        | 48               | 25               | 25                   | 23.4                |
| $\beta / \text{G}$         | –1               | –13.3            | –12.7                | 2.8                 |
| $\gamma / \text{G}$        | 1.5              | 2.7              | 2.8                  | 3.0                 |
| $\log \beta$               | –                | 14.78            | 6.50                 | –4.32               |

<sup>a</sup> The experimental errors were  $\pm 0.001$  for  $g_0$  and  $\pm 1$  G for couplings and linewidth parameters.

**Table S2.** Anisotropic EPR parameters calculated for the various species in the Cu(II) – SISC complexes. {30% (v/v) DMSO/H<sub>2</sub>O; *I* = 0.10 M (KCl)}<sup>a</sup>

|                            | Cu <sup>2+</sup> | [CuL] <sup>+</sup> | [CuLH <sub>1</sub> ] | [CuLH <sub>2</sub> ] <sup>+</sup> |
|----------------------------|------------------|--------------------|----------------------|-----------------------------------|
| $g_x$                      | 2.080            | 2.039              | 2.045                | 2.033                             |
| $g_y$                      | 2.080            | 2.059              | 2.048                | 2.045                             |
| $g_z$                      | 2.410            | 2.248              | 2.245                | 2.206                             |
| $g_0$ , calc. <sup>b</sup> | 2.190            | 2.115              | 2.113                | 2.095                             |
| $A_x / G$                  | 8                | 20                 | 14                   | 24                                |
| $A_y / G$                  | 8                | 22                 | 22                   | 33                                |
| $A_z / G$                  | 113              | 166                | 168                  | 205                               |
| $a_x^{N1} / G$             | –                | 9                  | 10                   | 18                                |
| $a_y^{N1} / G$             | –                | 14                 | 14                   | 16                                |
| $a_z^{N1} / G$             | –                | 11                 | 10                   | 14                                |
| $a_x^{N2} / G$             | –                | 16                 | 15                   | 14                                |
| $a_y^{N2} / G$             | –                | 8                  | 16                   | 22                                |
| $a_z^{N2} / G$             | –                | 15                 | 11                   | 6                                 |

<sup>a</sup> The experimental errors were  $\pm 0.002$  for  $g_x$  and  $g_y$ ,  $\pm 0.001$  for  $g_z$ ,  $\pm 2$  G for  $A_x$  and  $A_y$ , and  $\pm 1$  G for  $A_z$  and nitrogen couplings. <sup>b</sup> Isotropic values of the *g* tensor are calculated via equation:  $g_0 = (g_x + g_y + g_z)/3$ .

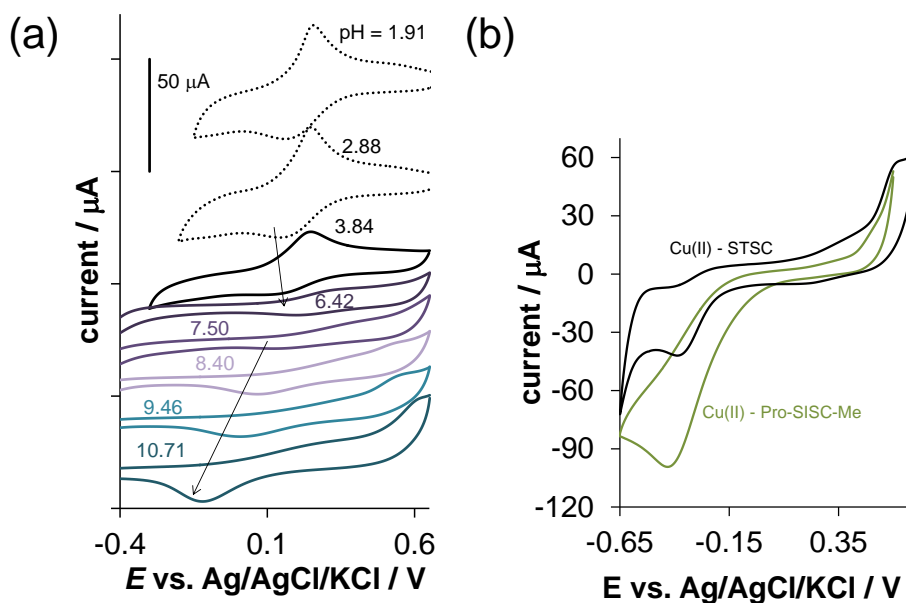

**Figure S11.** Cyclic voltammograms recorded for the (a) Cu(II) – SISC system at various pH values and for (b) Cu(II) – Pro-SISC-Me and Cu(II) – STSC systems at pH 7.4 at 1:1 metal-to-ligand ratio. {30% (v/v) DMSO/H<sub>2</sub>O; *c*<sub>ligand</sub> = *c*<sub>Cu(II)</sub> = 1 mM; *T* = 25 °C; *I* = 0.10 M (TBAN); scan rate: 20 mV/s}

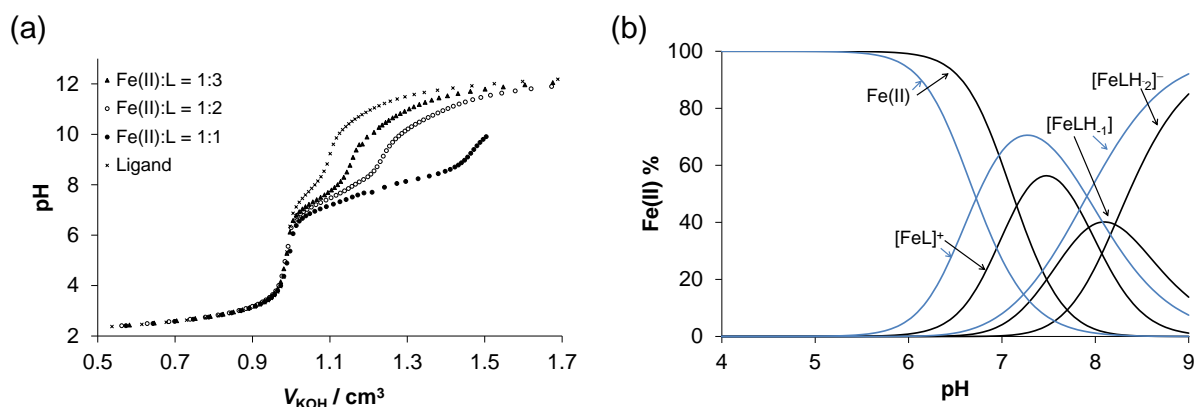

**Figure S12.** pH-potentiometric titration curves obtained for the (a) Fe(II) – SISC system in 30% (v/v) DMSO/H<sub>2</sub>O at various metal-to-ligand ratios (indicated in the figure). (b) Concentration distribution curves for the Fe(II) – SISC (black lines) and Fe(II) – Pro-SISC-Me (blue lines) systems at 1:2 metal-to-ligand ratio. { $C_{\text{ligand}} = 1 \text{ mM}$ ;  $T = 25 \text{ }^\circ\text{C}$ ;  $I = 0.10 \text{ M (KCl)}$ }

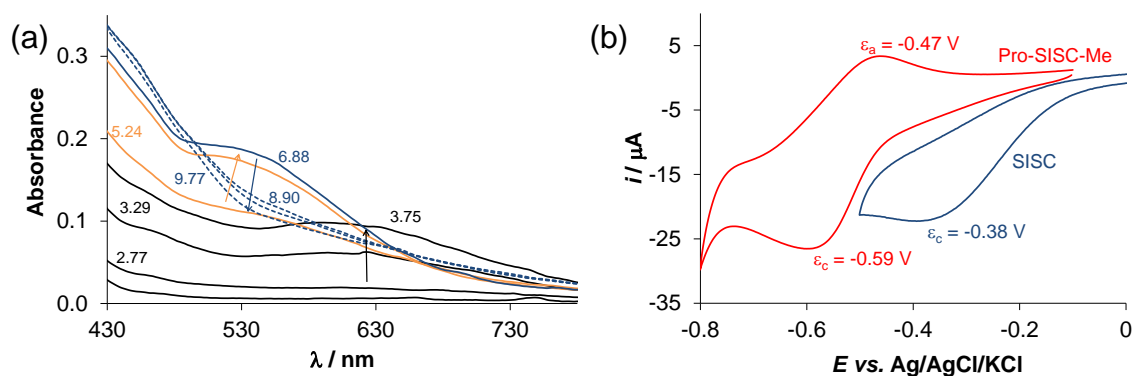

**Figure S13.** (a) UV-vis spectra recorded for the Fe(III) – SISC (1:2) system in 30% (v/v) DMSO/H<sub>2</sub>O at various pH values (indicated in the figure). { $C_{\text{ligand}} = 0.5 \text{ mM}$ ;  $T = 25 \text{ }^\circ\text{C}$ ;  $I = 0.10 \text{ M (KCl)}$ ;  $\ell = 1 \text{ cm}$ } (b) Cyclic voltammograms for the iron complexes of SISC (blue line) and Pro-SISC-Me (red line) at 1:2 metal-to-ligand ratio at pH 7.6 in 30% (v/v) DMSO/H<sub>2</sub>O. { $C_{\text{ligand}} = 1 \text{ mM}$ ;  $T = 25 \text{ }^\circ\text{C}$ ;  $I = 0.10 \text{ M (TBAN)}$ }

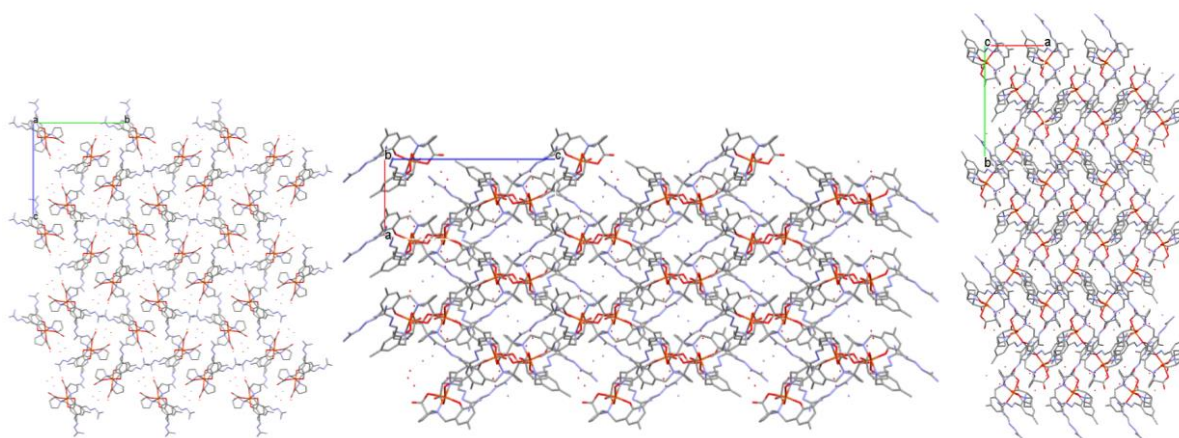

**Figure S14.** Packing arrangement of crystal (2) showing some selected hydrogen bonds and C-H... $\pi$  interactions.

**Table S3.** Crystal data and details of data collection for Pro-SISC-Me·HBr·4H<sub>2</sub>O (**1**)

| Compound                                          | <b>1</b>                                                            |
|---------------------------------------------------|---------------------------------------------------------------------|
| Empirical formula                                 | C <sub>15</sub> H <sub>30</sub> BrN <sub>5</sub> O <sub>7</sub>     |
| Formula weight                                    | 472.35                                                              |
| Space group                                       | orthorhombic, <i>P</i> 2 <sub>1</sub> 2 <sub>1</sub> 2 <sub>1</sub> |
| <i>Unit cell dimensions</i>                       |                                                                     |
| <i>a</i> (Å)                                      | 6.7067(2)                                                           |
| <i>b</i> (Å)                                      | 14.9720(4)                                                          |
| <i>c</i> (Å)                                      | 21.2674(5)                                                          |
| <i>V</i> (Å <sup>3</sup> )                        | 2135.52(10)                                                         |
| <i>Z</i>                                          | 4                                                                   |
| $\lambda$ (Å)                                     | 1.54178                                                             |
| Density (calculated) (mg/m <sup>3</sup> )         | 1.469                                                               |
| Crystal size (mm)                                 | 0.28 × 0.03 × 0.02                                                  |
| Temperature (K)                                   | 100(2)                                                              |
| Absorption coefficient, $\mu$ (mm <sup>-1</sup> ) | 3.027                                                               |
| <i>R</i> <sub>1</sub> <sup>a</sup>                | 0.0382                                                              |
| <i>wR</i> <sub>2</sub> <sup>b</sup>               | 0.1003                                                              |
| Goodness-of-fit <sup>c</sup>                      | 1.052                                                               |

<sup>a</sup>  $R_1 = \Sigma ||F_o| - |F_c|| / \Sigma |F_o|$ , <sup>b</sup>  $wR_2 = \{\Sigma[w(F_o^2 - F_c^2)^2] / \Sigma[w(F_o^2)^2]\}^{1/2}$ , <sup>c</sup> Goodness-of-fit (GOF) =  $\{\Sigma[w(F_o^2 - F_c^2)^2] / (n - p)\}^{1/2}$ , where *n* is the number of reflections and *p* is the total number of parameters refined.

**Table S4.** Crystal data and structure refinement of Na[Fe(III)(Pro-SISC-MeH-<sub>2</sub>)<sub>2</sub>](H<sub>2</sub>O)<sub>4</sub> (**2**)

| Compound                                              | <b>2</b>                                                                                       |
|-------------------------------------------------------|------------------------------------------------------------------------------------------------|
| Colour/shape                                          | Red/Chunk                                                                                      |
| Empirical formula                                     | C <sub>30</sub> H <sub>46</sub> N <sub>10</sub> O <sub>10</sub> FeNa                           |
| Moiety formula                                        | [Fe(C <sub>30</sub> H <sub>38</sub> N <sub>10</sub> O <sub>6</sub> )], 4(H <sub>2</sub> O), Na |
| Formula weight                                        | 785.61                                                                                         |
| Radiation and wavelength (Å)                          | Mo-Kα, λ =0.71073                                                                              |
| Crystal system                                        | orthorhombic                                                                                   |
| Space group                                           | <i>P</i> 2 <sub>1</sub> 2 <sub>1</sub> 2 <sub>1</sub>                                          |
| <i>Unit cell dimensions</i>                           |                                                                                                |
| a (Å)                                                 | 9.361(2)                                                                                       |
| b (Å)                                                 | 18.993(4)                                                                                      |
| c (Å)                                                 | 20.041(4)                                                                                      |
| Volume (Å <sup>3</sup> )                              | 3562.9(14)                                                                                     |
| Z/Z'                                                  | 4/1                                                                                            |
| Density (calculated) (mg/m <sup>3</sup> )             | 1.465                                                                                          |
| Absorption coefficient, μ (mm <sup>-1</sup> )         | 0.505                                                                                          |
| Crystal size (mm)                                     | 0.60 x 0.10 x 0.05                                                                             |
| Temperature (K)                                       | 103(2)                                                                                         |
| Absorption correction                                 | Numerical                                                                                      |
| Data / restraints / parameters                        | 6003 /12 /495                                                                                  |
| <i>R</i> <sub>1</sub> <sup>a</sup>                    | 0.1051                                                                                         |
| <i>wR</i> <sub>2</sub> <sup>b</sup>                   | 0.2268                                                                                         |
| Goodness-of-fit on <i>F</i> <sup>2</sup> <sup>c</sup> | 1.092                                                                                          |

<sup>a</sup>  $R_1 = \sum ||F_o| - |F_c|| / \sum |F_o|$ . <sup>b</sup>  $wR_2 = \{\sum [w(F_o^2 - F_c^2)^2] / \sum [w(F_o^2)^2]\}^{1/2}$ . <sup>c</sup> Goodness-of-fit (GOF) =  $\{\sum [w(F_o^2 - F_c^2)^2] / (n - p)\}^{1/2}$ , where *n* is the number of reflections and *p* is the total number of parameters refined.
